# Supplementary material
Source: publisher site journal article supplement (https://www.dovepress.com/article/564132)
Supplement: Supplementary file 1 [file 564132%20Supplementary%20material%20%2525281%252529.docx]

**Supplementary Material:**

**Supplementary** **Table 1. Summary of Studies Excluded from Final Review and Reasons for Exclusion.**

| **S. NO** | **Title** | **Year** | **Reason for Exclusion** | **Explanation** |
| --- | --- | --- | --- | --- |
| 1 | Increasing oral PMN during experimental gingivitis and its reversal by prophylaxis | 2021 | Comparison criterion not met | No comparison of different EG induction models; only compares with/without prophylaxis which is considered a co-treatment and thus excluded. |
| 2 | Lactate dehydrogenase, beta-glucuronidase and arylsulfatase activity in gingival crevicular fluid associated with experimental gingivitis in man | 1985 | Comparison and Outcome criteria not met | No comparison of EG models; outcomes focus only on biochemical markers (enzymes), lacking required clinical indices as primary outcome measures. |
| 3 | Lactoferrin in Gingival Crevicular Fluid and Peripheral Blood during Experimental Gingivitis | 2009 | Comparison and Outcome criteria not met | No comparison of EG models; focus is on biochemical marker (lactoferrin) with clinical scores as secondary outcomes only. |
| 4 | Levels of parotid and submandibular/sublingual salivary immunoglobulin A in response to experimental gingivitis in humans | 2004 | Comparison and Outcome criteria not met | No comparison of EG models; primary outcome was salivary IgA, with clinical indices not being a focus. |
| 5 | Levels of salivary IgA antibodies reactive with bacteria from dental plaque are associated with susceptibility to experimental gingivitis | 1993 | Comparison and Outcome criteria not met | No EG model comparison; outcomes focus on immune markers, not clinical inflammation. |
| 6 | Levels of TGFbeta1 in gingival crevicular fluid during a 21-day experimental model of gingivitis. | 2003 | Comparison criterion not met | No methodological variation in EG induction protocol; only healthy vs. inflamed site comparison within the same protocol. |
| 7 | Longitudinal changes in TCRB variable gene expression and markers of gingival inflammation in experimental gingivitis | 1998 | Comparison criterion not met | No EG protocol comparison; focus is gene expression over time, not methodological differences. |
| 8 | Macrophage activity is associated with gingival inflammation: Soluble CD163 in an experimental gingivitis study | 2020 | Comparison criterion not met | Did not compare EG models; explored biomarker trajectory within a single model. |
| 9 | Oral microbiota in smokers and non-smokers in natural and experimentally-induced gingivitis | 1998 | Comparison and Outcome criteria not met | Focus is on microbiota changes across smoking status and gingivitis types, not on methodological variations or clinical outcomes |
| 10 | Oral microbiota in subjects with a weak or strong response in experimental gingivitis | 1995 | Intervention and Outcome criteria not met | Study does not apply new EG intervention; focuses on oral microbiota comparison months after prior trials with no clinical outcome focus. |
| 11 | Oral odors in early experimental gingivitis | 1984 | Outcome criterion not met | Study focused on volatile chemical biomarkers (VSC, salivary volatiles), with only limited reference to clinical parameters; main objective was malodor biochemistry. |
| 12 | Permeability of the gingival tissues to IgM during an experimental gingivitis study in man | 1997 | Outcome criterion not met | The study's primary aim was to assess changes in IgM levels and tissue permeability, not clinical inflammatory outcomes like gingival or plaque index. |
| 13 | Phenotypic dynamics of macrophage subpopulations during human experimental gingivitis | 1989 | Outcome criterion not met | The study primarily focused on immunohistological characterization of macrophage subtypes, not clinical inflammatory outcomes like plaque or bleeding indices. |
| 14 | Proteomic analysis of a noninvasive human model of acute inflammation and its resolution | 2010 | Outcome criterion not met | The study’s primary focus was proteomic profiling of inflammation resolution, not clinical inflammation outcomes like gingival index or bleeding. |
| 15 | Relationship between levels of aspartate aminotransferase in gingival crevicular fluid and gingival inflammation | 1990 | Outcome criterion not met | The study focused primarily on AST enzyme levels as biomarkers for inflammation, rather than clinical inflammation progression as a primary outcome. |
| 16 | Relationship of surface epithelium concentrations of IL-1 alpha and IL-1 beta to clinical inflammation during experimental gingivitis | 2000 | Outcome criterion not met | Although clinical indices were used, the primary objective was to measure cytokine levels (IL-1α, IL-1β), not clinical inflammation as a primary endpoint. |
| 17 | Relationships of serum opsonins and complement in human experimental gingivitis | 1987 | Outcome criterion not met | Primary outcomes focused on immunological markers (IgG, IgA, complement), not clinical inflammation metrics. |
| 18 | Response of chronic gingivitis to hygiene therapy and experimental gingivitis: Clinical, microbiological and metabonomic changes | 2015 | Intervention criterion not met | The study involved hygiene therapy prior to experimental gingivitis induction, which violates the exclusion criteria for co-treatments during induction. |
| 19 | Response to a plaque control regimen on different levels of gingival inflammation | 2003 | Intervention criterion not met | The study evaluated the effectiveness of a treatment regimen post-EG induction, rather than the EG induction methods themselves |
| 20 | Salivary cytokine levels in early gingival inflammation | 2017 | Outcome criterion not met | The study primarily investigated salivary cytokine responses to gingivitis, not clinical inflammation outcomes, and found no significant correlation. |
| 21 | Salivary Cytoprotective Proteins in Inflammation and Resolution during Experimental Gingivitis—A Pilot Study | 2015 | Outcome criterion not met | The study primarily measured changes in cytoprotective salivary proteins; clinical inflammation was not the main outcome of interest. |
| 22 | Salivary levels of MPO, MMP-8 and TIMP-1 are associated with gingival inflammation response patterns during experimental gingivitis. | 2019 | Intervention criterion not met | The study included a 2-week hygiene phase prior to induction, violating the no pre-treatment criterion. |
| 23 | Salivary Total Protease Activity Based on a Broad-Spectrum Fluorescence Resonance Energy Transfer Approach to Monitor Induction and Resolution of Gingival Inflammation | 2019 | Outcome criterion not met | The primary aim was to monitor protease activity using a biochemical assay; clinical inflammation was not the primary endpoint. |
| 24 | Studies of host responses during experimental gingivitis in humans. I. Polymorphonuclear leukocyte responses to autologous plaque collected during the development of gingival inflammation. | 1979 | Outcome criterion not met | The main focus was in vitro immune cell activation (PMN lysosome release) rather than clinical inflammation. |
| 25 | Sulphur By-Product: The Relationship between Volatile Sulphur Compounds and Dental Plaque-Induced Gingivitis | 2004 | Outcome criterion not met | The study primarily investigated VSC levels in relation to inflammation; clinical inflammation was not the main focus. |
| 26 | Supragingival microbiota, cytokines, and proteins in individuals with different trajectories in experimental gingivitis | 2024 | Outcome criterion not met | While clinical measures were collected, the primary focus was on microbial and salivary biomarker profiling, not clinical inflammation itself. |
| 27 | The effect of removable partial denture framework design on gingival inflammation: a clinical model | 1992 | Intervention criterion not met | Gingival inflammation was induced by denture wear, not hygiene cessation, violating the experimental gingivitis induction criteria. |
| 28 | Time as a factor in the identification of subjects with different susceptibility to plaque-induced gingivitis | 2006 | Outcome criterion not met | The primary outcome was GCF adjusted for CPE; clinical inflammation was not the main endpoint as required. |
| 29 | Treatment efficacy of photoactivated disinfection versus Salvadora persica gel in experimental gingivitis | 2020 | Intervention involves co-treatment during induction phase | The study focuses on treatment efficacy using PAD and Salvadora persica gel following a 14-day EG induction phase. The experimental design evaluates therapeutic interventions, not methodological variations in induction. This violates the exclusion criterion under the Intervention domain: “Studies primarily investigating treatment efficacy.” |
| 30 | T-shaped toothbrush for plaque removal and gingival health in children: a randomized controlled trial | 2022 | Natural gingivitis and product efficacy trial | The study focused on naturally occurring gingivitis in children and tested a toothbrush design, rather than evaluating experimental gingivitis induction methods or their variations. This violates both Population and Intervention criteria. |

**Supplementary** **Table 2:** Risk of Bias (RoB) Assessment Summary for 3 Randomized control trial among the Included Studies Across Key Methodological Domains.

| **Study Title** | **Randomization** | **Deviations from Interventions** | **Missing Outcome Data** | **Measurement of Outcome** | **Selection of Reported Result** | **Overall RoB** |
| --- | --- | --- | --- | --- | --- | --- |
| **Digital Gingivitis Image Analysis (2016)**12 | Some concerns – randomization mentioned but concealment unclear | Some concerns – participants likely aware of group | Low risk – no attrition | Low risk – objective, blinded examiners | Some concerns – no pre-specified analysis plan | Some concerns |
| **Frequent Sugar Intake and Gingivitis (1984)**11 | Some concerns – random allocation, unclear concealment | Some concerns – participants not blinded, dietary self-report | Low risk – minimal and balanced | Low risk – objective, blinded assessment | Some concerns – no protocol registration | Some concerns |
| **Intermittent Fasting and Gingival Inflammation (2025)**9 | Some concerns – BF group not randomized | Some concerns – participant blinding not feasible | Low risk – imputation for minor missing data | Low risk – blinded, calibrated assessments | Low risk – outcomes clearly reported | Some concerns |

**Supplementary** **Table 3.** Risk of Bias Assessment for Non-Randomized Studies Using the ROBINS-I Tool.

| **Study** | **Domain 1 (Confounding)** | **Domain 2 (Classification of Interventions)** | **Domain 3 (Selection of Participants)** | **Domain 4 (Deviations from Intended Interventions)** | **Domain 5 (Missing Data)** | **Domain 6 (Measurement of Outcome)** | **Domain 7 (Selection of Reported Result)** | **Overall Risk of Bias** |
| --- | --- | --- | --- | --- | --- | --- | --- | --- |
| **Seymour et al. (1983)**15 | Moderate | Low | Low | Low | Low | Low | Moderate | **Moderate** |
| **Leishman et al. (2013)**10 | Serious | Low | Low | Low | Moderate | Low | Moderate | **Serious** |
| **Kowolik et al. (2001)**14 | Serious | Low | Low | Low | Low | Low | Moderate | **Serious** |
| **Danielsen et al. (1989)**8 | Serious | Low | Low | Low | Moderate | Low | Moderate | **Serious** |

**Supplementary** **Table 4.** Newcastle–Ottawa Scale (NOS) Quality Assessment for Included Cohort Studies.

| **Study Title** | **Study Design** | **Selection (max 4)** | **Comparability (max 2)** | **Outcome (max 3)** | **Total (max 9)** | **Overall Rating** |
| --- | --- | --- | --- | --- | --- | --- |
| *Identification of inflammatory response patterns in experimental gingivitis studies* | Cohort | ★★★ | ★ | ★★ | 6 | Good |
| *Influence of Nutrition and Physical Activity on Local and Systemic Inflammatory Signs in Experimental Gingivitis* | Cohort | ★★★ | ★★ | ★★ | 7 | Good |
| *Interepithelial lymphocytes in experimental gingivitis in young and elderly individuals* | Cohort | ★★★ | ★ | ★★ | 6 | Good |

*Abbreviations:* *Symbols:* ★ = score assigned per Newcastle–Ottawa Scale domain (Selection, Comparability, Outcome). Higher number of stars indicates higher methodological quality.
*Notes:* Studies were rated as *Good* (6–7 stars), *Fair* (4–5 stars), or *Poor* (≤3 stars) according to the Agency for Healthcare Research and Quality (AHRQ) criteria.
